# Supplementary material
Source: PubMed Central journal article supplement (PMC7903599)
Supplement: 12954_2021_473_MOESM1_ESM.pdf [file 12954_2021_473_MOESM1_ESM.pdf]

Additional File 1. Substitution medication by region

Table 1: Proportion of substitution medication by region

| Substitution Medication | Vienna | Other Regions |
|-------------------------|--------|---------------|
| Methadone               | 14.5%  | 23.3%         |
| Levo-methadone          | 6.6%   | 8.6%          |
| Buprenorphine           | 24.3%  | 23.8%         |
| Buprenorphine/naloxone  | 5.2%   | 5.3%          |
| Slow release morphine   | 48.2%  | 36.3%         |
| Other                   | 0.1%   | 1.9%          |
| Unknown                 | 1.1%   | 0.9%          |
